# Supplementary material for: Binding sites on the outside of metallo-supramolecular architectures; engineering coordination polymers from discrete architectures
Source: Royal Society of Chemistry journal article supplement (doi:10.1039/b403749a), 2004-01-01
Supplement: b403749a.pdf [file b403749a.pdf]

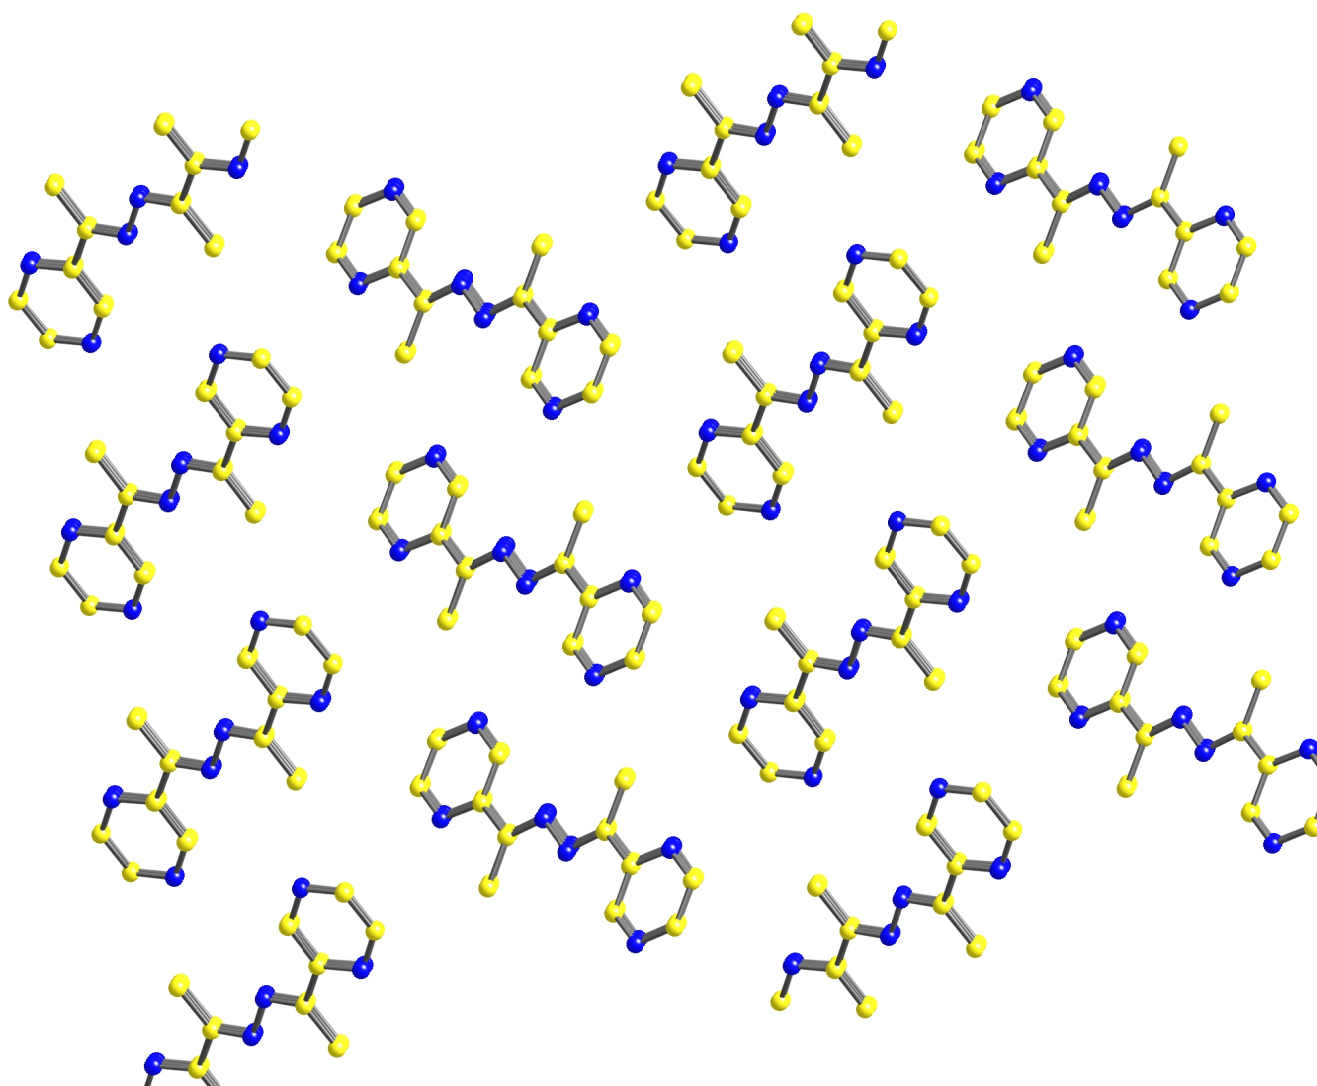

**Figure S1:** View showing the herringbone style packing of the  $\pi$ -stacked columns in the structure of ligand  $L_a$
